# Supplementary material
Source: MDPI journal article supplement (https://www.mdpi.com/2673-8023/1/2/13)
Supplement: s1 [file s1]

Archive with 1 entries (1 files):
- micro-1341872-supplementary.pdf
